# Supplementary material
Source: PubMed Central journal article supplement (PMC4457494)
Supplement: mmc1.pdf [file mmc1.pdf]

**Biophysical Journal**

**Supporting Material**

**In Situ Quantification of Protein Binding to the Plasma Membrane**

Elizabeth M. Smith,<sup>1</sup> Jared Hennen,<sup>1</sup> Yan Chen,<sup>1,3</sup> and Joachim D. Mueller<sup>1,2,3,\*</sup>

<sup>1</sup>School of Physics and Astronomy, <sup>2</sup>Department of Biomedical Engineering, and <sup>3</sup>Institute for Molecular Virology, University of Minnesota, Minneapolis, Minnesota

## Supporting Material

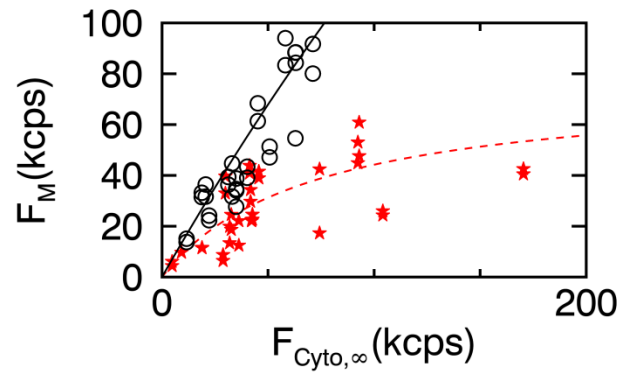

Figure S1: Close-up view of the low cytoplasmic intensity region of Figure 5A. Binding curve for EGFP-PCL $\delta$ -PH (open circles) and fit (solid line) are shown together with the competitive binding curve for EGFP-PCL $\delta$ -PH coexpressed with MiniGAP-mCh (solid stars) and fit (dotted line).
